# American Psychiatric Association Publishing Textbook of Psychopharmacology, Fifth Edition

Edited by Alan F. Schatzberg, M.D., and Charles B. Nemeroff, M.D., Ph.D.

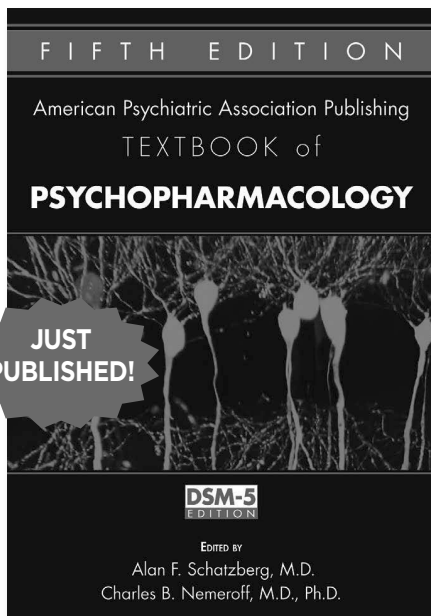

The *American Psychiatric Association Publishing Textbook of Psychopharmacology* is an indispensable and comprehensive resource for clinicians and trainees who prescribe psychotropic medications. Updated to reflect the new DSM-5 classification, this revised Fifth Edition maintains the user-friendly structure of its predecessors while offering in-depth coverage of the latest research in pharmacological principles, classes of drugs, and psychiatric disorders. Introductory chapters provide a theoretical grounding in clinical applications, with topics ranging from neurotransmitters to brain imaging in psychopharmacology. The bulk of the book is devoted to various classes of drugs, including antidepressants, anxiolytics, antipsychotics, mood stabilizers, and other agents, with each class divided into chapters on specific drugs—either new or revised to include the latest findings and trends.

Finally, the section on psychopharmacological treatment addresses evidence-based principles of clinical care for the full spectrum of mental disorders and conditions as well as for specific populations and circumstances—offering information on topics such as medication selection, combination and maintenance dosing regimens, monitoring and management of side effects, and strategies for optimizing treatment response.

## The book's beneficial features are many:

- The section on principles of pharmacology has been revised and reorganized to incorporate recent discoveries from the fields of neurobiology, genetics, brain imaging, and epidemiology.
- History and discovery, structure-activity relationships, pharmacological profiles, pharmacokinetics and disposition, mechanisms of action, indications and efficacy, side effects and toxicology, and drug-drug interactions are addressed for each agent. This consistent structure places the desired information at the clinician's fingertips and facilitates study for trainees.
- Coverage of drugs approved since the last edition is thorough, encompassing new antidepressants (e.g., vortioxetine), new antipsychotics (e.g., cariprazine), and agents on the clinical horizon (e.g., ketamine).

A work of uncommon scientific rigor and clinical utility, *The American Psychiatric Association Publishing Textbook of Psychopharmacology* provides state-of-the-art information on both the principles and the practice of psychopharmacological treatment of psychiatric disorders.

2017 • 1,823 pages • ISBN 978-1-58562-523-9 • Hardcover • \$299.00 • Item #62523

2017 • 1,823 pages • ISBN 978-1-61537-122-8 • eBook • \$240.00 • Item #37122

AMERICAN  
PSYCHIATRIC  
ASSOCIATION  
PUBLISHING

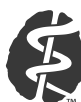

[www.appi.org](http://www.appi.org)

Email: [appi@psych.org](mailto:appi@psych.org)

Toll Free: 1-800-368-5777

20% Discount for American Psychiatric Association Members  
25% Discount for APA Resident-Fellow Members

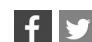

Priority Code AH1713

## The Art and Science of Brief Psychotherapies *A Practitioner's Guide, Third Edition*

Edited by Mantosh J. Dewan, M.D.,  
Brett N. Steenbarger, Ph.D., and Roger P. Greenberg, Ph.D.

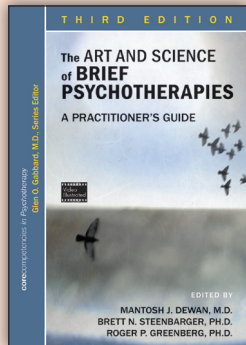

**Just Published!**

**Video Illustrated**

Each chapter is thoroughly updated, and new chapters cover such topics as dialectical behavior therapy, multicultural practice, and mentalizing, as well as fresh approaches to intervention, such as telepsychiatry and Internet-based interventions.

2018 • 397 pages • ISBN 978-1-61537-079-5 • Paperback • \$87.00 • Item #37079

2018 • 397 pages • ISBN 978-1-61537-151-8 • eBook • \$70.00 • Item #37151

AMERICAN  
PSYCHIATRIC  
ASSOCIATION  
PUBLISHING

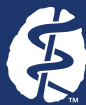

www.appi.org  
Email: appi@psych.org  
Phone: 1-800-368-5777

AH1744A

# Our Work **Matters**

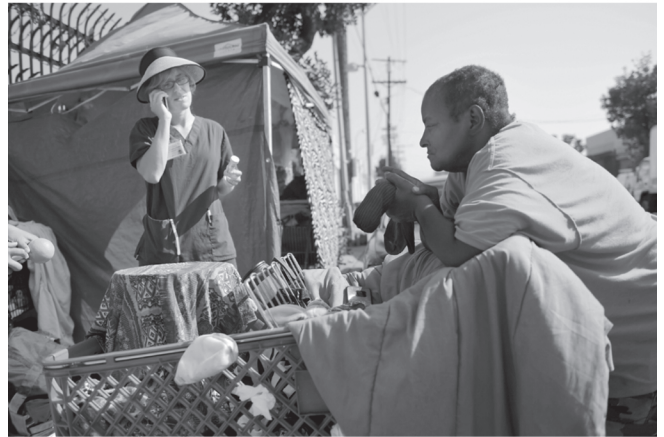

Join us and make a difference for  
those who need it the most.

Los Angeles County Department of Mental Health is a nationally recognized leader providing a wide range of services to one of the largest populations in the country. We invite you to join our team as we help the most vulnerable in our community find a path to independence and personal recovery.

Competitive salary **starting at \$233,784/yr** with **benefits/potential bonuses** up to \$30,000/yr and **24hrs/wk** for outside employment.

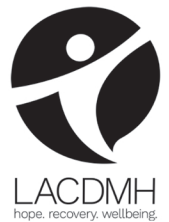

LACDMH  
hope. recovery. wellbeing.

[www.psychiatristjobs.la](http://www.psychiatristjobs.la)

Visit [ps.psychiatryonline.org](http://ps.psychiatryonline.org) for these features!

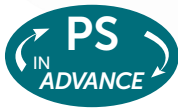

*New content is available in advance of print every 2 weeks!*

**Psychiatry's Role in Improving the Physical Health of Patients With Serious Mental Illness: A Report From APA**

**National Estimates of Recovery-Remission from Serious Mental Illnesses**

Psychiatric  
Services  
**FROM PAGES  
TO PRACTICE**

*Audio highlights of PS in Advance content*

Listen to our podcast, **Psychiatric Services From Pages to Practice**, and learn about the latest mental health services research and why it is relevant.

**Episode 8:** Standardized discharge versus natural attrition from IPS supported employment; addressing use of constant observation in a general hospital; a look at peer support programs, task shifting, and mental health first aid for improving mental health services

**Sign up (<http://appi.org/etocs>) to receive alerts as soon as new content is available.**

AMERICAN  
PSYCHIATRIC  
ASSOCIATION  
PUBLISHING

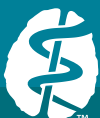

[ps.psychiatryonline.org](http://ps.psychiatryonline.org)

www.appi.org • 1-800-368-5777 • e-mail: appi@psych.org

Keep up with the latest from *Psychiatric Services* on  
Facebook ([facebook.com/PsychiatryOnline](https://facebook.com/PsychiatryOnline)) and Twitter (@APAPubPsychSvcs).

# The DSM-5 Collection

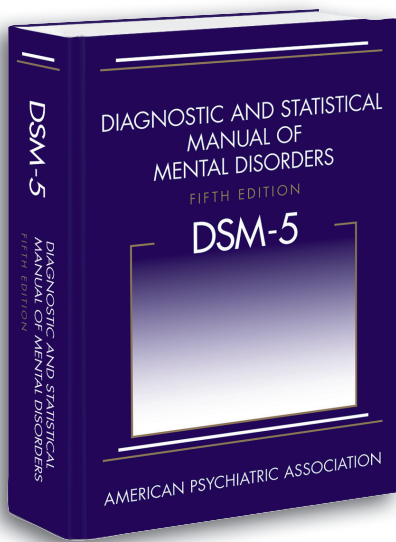

## Diagnostic and Statistical Manual of Mental Disorders, Fifth Edition (DSM-5®)

American Psychiatric Association

This new edition of *Diagnostic and Statistical Manual of Mental Disorders* (DSM-5®), used by clinicians and researchers to diagnose and classify mental disorders, is the product of more than 10 years of effort by hundreds of international experts in all aspects of mental health. Their dedication and hard work have yielded an authoritative volume that defines and classifies mental disorders in order to improve diagnosis, treatment, and research.

The criteria are concise and explicit, intended to facilitate an objective assessment of symptom presentations in a variety of clinical settings—inpatient, outpatient, partial hospital, consultation-liaison, clinical, private practice, and primary care.

- The latest findings in neuroimaging and genetics have been integrated into each disorder along with gender and cultural considerations.
- The revised organizational structure recognizes symptoms that span multiple diagnostic categories, providing new clinical insights in diagnosis.

- Both ICD-9-CM and ICD-10-CM codes are included for each disorder.

The *Diagnostic and Statistical Manual of Mental Disorders*, Fifth Edition, is the most comprehensive, current, and critical resource for clinical practice available to today's mental health professionals.

2013 • 991 pages • ISBN 978-0-89042-554-1 • Hardcover • \$210.00 • Item #2554

2013 • 991 pages • ISBN 978-0-89042-555-8 • Paperback • \$160.00 • Item #2555

2013 • 991 pages • ISBN 978-0-89042-557-2 • eBook • \$128.00 • Item #2557

**DSM-5**  
COLLECTION

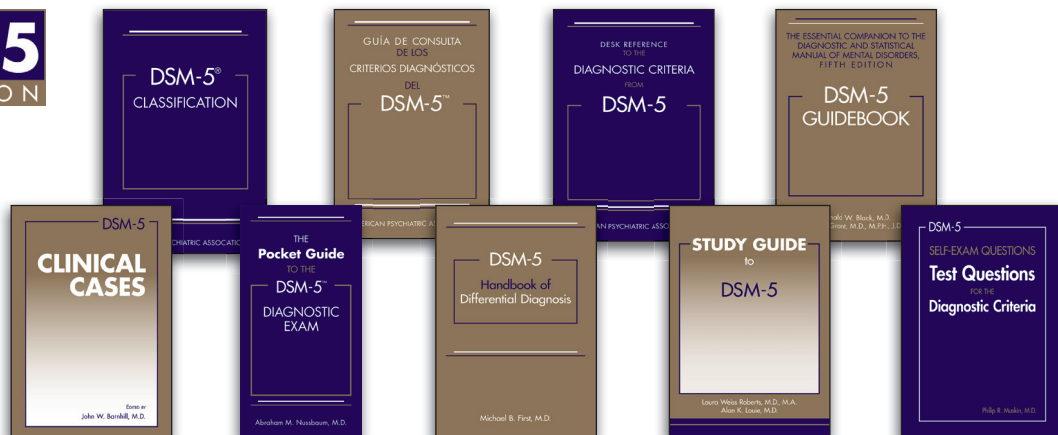

AMERICAN  
PSYCHIATRIC  
ASSOCIATION  
PUBLISHING

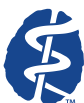

Order Online: [www.appi.org](http://www.appi.org)  
Phone: 703-907-7322  
Toll Free: 1-800-368-5777  
Email: [appi@psych.org](mailto:appi@psych.org)

20% Discount for American Psychiatric Association Members

25% Discount for APA Resident-Fellow Members AH1706A
