# Psychiatric Services

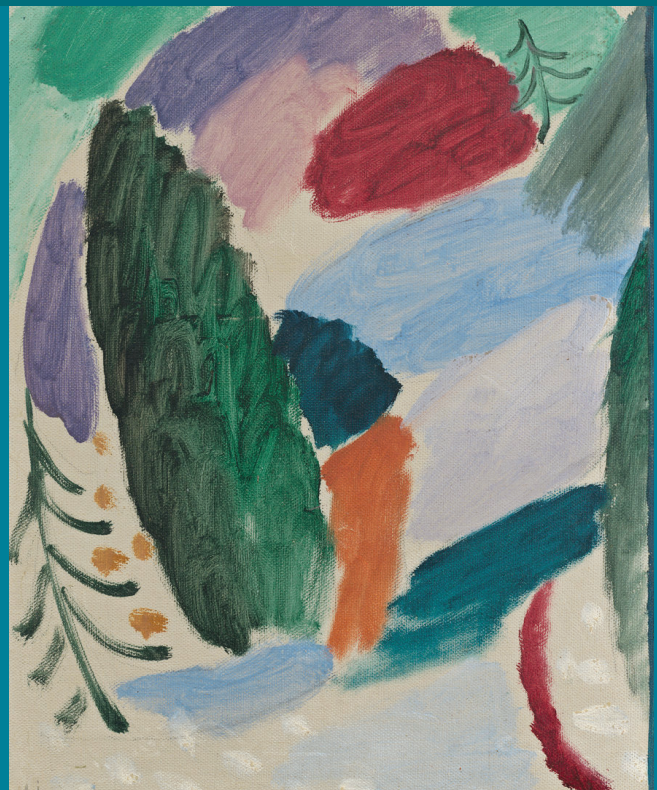

Communication strategies to counter stigma

Concerning trends in cigarette smoking by people with serious mental illness

Impact of ACA health reforms for people with mental health conditions

Growth in chronic use of benzodiazepines and nonbenzodiazepine hypnotics

AMERICAN  
**PSYCHIATRIC**  
ASSOCIATION

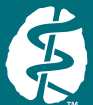

[ps.psychiatryonline.org](http://ps.psychiatryonline.org)
