# New Titles on Integrated Care

Just Published!

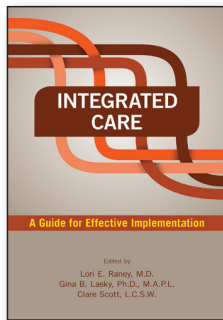

## *Integrated Care*

### *A Guide for Effective Implementation*

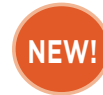

Edited by Lori E. Raney, M.D., Gina B. Lasky, Ph.D., M.A.P.L., and Clare Scott, L.C.S.W.

This book provides a detailed, thoughtful, and experience-based guide to the complex and potentially overwhelming process of implementing an integrated care program. The advantages of integrated care from both the clinical and administrative perspectives are many, including better detection of illness, improvement in overall health outcomes, a better patient care experience, and flexibility in responding to policy and financial changes. The book addresses the emerging framework of core principles for effective integrated care, reviews the most up-to-date research on implementation, and presents practice-based experience to serve as a guide. This information is useful in both traditional integration of behavioral health into general medical settings or integrating general medical care into a specialty mental health or substance use treatment setting. Because administrators, clinicians, policy makers, payers and others need guidance in determining what effective implementation looks like, the authors offer a three-part examination of the key components of an implementation strategy and explore the elements essential for success.

2017 • 290 pages • ISBN 978-1-61537-054-2 • Paperback • \$59.00 • Item #37054  
2017 • 290 pages • ISBN 978-1-61537-133-4 • eBook • \$47.00 • Item #37133

## *Study Guide to Preventive Medical Care in Psychiatry*

### *A Case Approach*

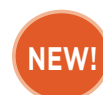

Edited by Robert M. McCarron, D.O., Glen L. Xiong, M.D., Craig R. Keenan, M.D., Lorin M. Scher, M.D., Jaesu Han, M.D., and Mark E. Servis, M.D.

*Study Guide to Preventive Medical Care in Psychiatry: A Case Approach* is an indispensable companion to *Preventive Medical Care in Psychiatry: A Practical Guide for Clinicians*. Like the primary text, the study guide was written by experts in the field and it reflects the text's focus on clinical care for psychiatrists and other mental health care providers who work in outpatient mental health and integrated clinics. Through the deft use of clinical cases, the study guide helps providers and trainees acquire the knowledge and skills necessary to view the patient holistically and improve outcomes.

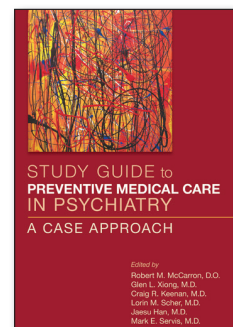

2017 • 313 pages • ISBN 978-1-61537-057-3 • Paperback • \$59.00 • Item #37057  
2017 • 313 pages • ISBN 978-1-61537-116-7 • eBook • \$47.00 • Item #37116

Order Now [www.appi.org](http://www.appi.org)

20% Discount for American Psychiatric Association Members  
25% Discount for APA Resident-Fellow Members

Please use Priority Code AH1737 when ordering.

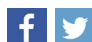

AMERICAN  
PSYCHIATRIC  
ASSOCIATION  
PUBLISHING

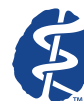

[www.appi.org](http://www.appi.org)

Email: [appi@psych.org](mailto:appi@psych.org)

Toll Free: 1-800-368-5777
